# Supplementary material for: Integrative Analysis of Metabolomics and Transcriptomics Reveals Molecular Mechanisms of Anthocyanin Metabolism in the Zikui Tea Plant (Camellia sinensis cv. Zikui)
Source: MDPI journal article supplement (doi:10.3390/ijms23094780), 2022-04-26

**Supplementary Table S1.** Classification and identification of differential metabolites in Zikui (ZK) and N61 tea plants.

| Type                           | Number    | Percentage   |
|--------------------------------|-----------|--------------|
| All                            | 446       | 100          |
| Phenolic acids                 | 73        | 16.368       |
| Amino Acid And Its Derivatives | 54        | 12.108       |
| <b>Flavonoid</b>               | <b>34</b> | <b>7.623</b> |
| Nucleotide and its derivates   | 30        | 6.726        |
| Organic acids                  | 29        | 6.502        |
| Flavonols                      | 27        | 6.054        |
| Alcohols and polyols           | 23        | 5.157        |
| Free fatty acids               | 23        | 5.157        |
| Flavonoid carbonoside          | 19        | 4.26         |
| flavanols                      | 15        | 3.363        |
| LPC                            | 14        | 3.139        |
| Others                         | 14        | 3.139        |
| <b>Proanthocyanidins</b>       | <b>14</b> | <b>3.139</b> |
| Alkaloids                      | 11        | 2.466        |
| Lignans                        | 8         | 1.794        |
| Dihydro flavonoid              | 7         | 1.57         |

|                     |          |              |
|---------------------|----------|--------------|
| Glycerol ester      | 7        | 1.57         |
| <b>Anthocyanins</b> | <b>6</b> | <b>1.345</b> |
| Dihydroflavonol     | 5        | 1.121        |
| LPE                 | 5        | 1.121        |
| Isoflavones         | 4        | 0.897        |
| Phenolamine         | 4        | 0.897        |
| vitamin             | 4        | 0.897        |
| Coumarins           | 3        | 0.673        |
| Sphingolipids       | 3        | 0.673        |
| Chalcone            | 2        | 0.448        |
| PC                  | 2        | 0.448        |
| Plumerane           | 2        | 0.448        |
| Orange Flavonoids   | 1        | 0.224        |
| Steroid             | 1        | 0.224        |
| Tannin              | 1        | 0.224        |
| Xanthone            | 1        | 0.224        |

---

**Supplementary Table S2.** Anthocyanin and proanthocyanidin metabolites content in Zikui (ZK) and N61 tea plants in 15-d-old leaves.

| Index     | 15 d N61 | 15 d ZK  | log2_FC(15 d ZK /<br>15 d N61) | Compounds                        | Class II          |
|-----------|----------|----------|--------------------------------|----------------------------------|-------------------|
| mws0997   | 3.36E+05 | 3.96E+07 | 6.88                           | Petunidin 3- <i>O</i> -glucoside | Anthocyanins      |
| mws1048   | 1.48E+06 | 1.58E+07 | 3.42                           | Cyanidin3- <i>O</i> -galactoside | Anthocyanins      |
| pmb0550   | 1.58E+06 | 1.44E+07 | 3.19                           | Cyanidin 3- <i>O</i> -glucoside  | Anthocyanins      |
| pmp000004 | 6.38E+05 | 2.83E+06 | 2.15                           | Jaceosidin                       | Anthocyanins      |
| mws0171   | 6.37E+06 | 8.18E+06 | 0.36                           | Cyanin chloride                  | Anthocyanins      |
| mws0169   | 3.41E+06 | 3.18E+06 | -0.10                          | Cyanidin 3–rutinoside            | Anthocyanins      |
| mws0836   | 8.54E+05 | 7.51E+05 | -0.18                          | Procyanidin B1                   | Proanthocyanidins |
| pmb0837   | 1.33E+05 | 8.67E+04 | -0.62                          | Procyanidin A3                   | Proanthocyanidins |
| pmn001647 | 6.80E+05 | 4.07E+05 | -0.74                          | procyanidin C2                   | Proanthocyanidins |
| pmb2947   | 1.45E+06 | 8.18E+05 | -0.82                          | Catechin-catechin-catechin       | Proanthocyanidins |
| pmp000280 | 2.17E+06 | 1.20E+06 | -0.86                          | procyanidin C-2                  | Proanthocyanidins |
| pme0436   | 3.26E+07 | 1.71E+07 | -0.93                          | Procyanidin B3                   | Proanthocyanidins |
| pmp000275 | 5.99E+04 | 3.14E+04 | -0.93                          | gambiriin A-1                    | Proanthocyanidins |
| pmp000274 | 1.21E+07 | 5.59E+06 | -1.11                          | procyanidin B-3                  | Proanthocyanidins |
| pmn001646 | 5.15E+05 | 1.83E+05 | -1.49                          | procyanidin C1                   | Proanthocyanidins |
| mws1293   | 5.71E+06 | 1.47E+06 | -1.95                          | Theaflavin                       | Proanthocyanidins |

|           |          |          |       |                           |                   |
|-----------|----------|----------|-------|---------------------------|-------------------|
| pmp000273 | 1.55E+05 | 2.57E+04 | -2.59 | gambiridin B-3            | Proanthocyanidins |
| mws1295   | 2.19E+06 | 2.99E+05 | -2.87 | Theaflavin-3'-gallate     | Proanthocyanidins |
| mws1294   | 2.82E+06 | 3.79E+05 | -2.89 | Theaflavin-3-gallate      | Proanthocyanidins |
| mws1296   | 5.02E+06 | 4.31E+05 | -3.54 | Theaflavin-3-3'-digallate | Proanthocyanidins |

Key metabolites are enclosed in red boxes.

**Supplementary Table S3.** Anthocyanin and proanthocyanidin metabolite content in Zikui (ZK) tea plant at 15 d and 45 d.

| Index     | 15 d ZK  | 45 d ZK  | log2_FC(15 d ZK<br>/45 d ZK) | Compounds                         | Class II          |
|-----------|----------|----------|------------------------------|-----------------------------------|-------------------|
| mws1293   | 1.47E+06 | 2.12E+04 | 6.12                         | Theaflavin                        | Proanthocyanidins |
| mws1294   | 3.79E+05 | 7.66E+03 | 5.63                         | Theaflavin-3-gallate              | Proanthocyanidins |
| mws1295   | 2.99E+05 | 8.90E+03 | 5.07                         | Theaflavin-3'-gallate             | Proanthocyanidins |
| mws1296   | 4.31E+05 | 1.58E+04 | 4.77                         | Theaflavin-3-3'-digallate         | Proanthocyanidins |
| mws1048   | 1.58E+07 | 3.20E+06 | 2.30                         | Cyanidin 3- <i>O</i> -galactoside | Anthocyanins      |
| pmb0550   | 1.44E+07 | 3.32E+06 | 2.12                         | Cyanidin 3- <i>O</i> -glucoside   | Anthocyanins      |
| mws0997   | 3.96E+07 | 1.14E+07 | 1.80                         | Petunidin 3- <i>O</i> -glucoside  | Anthocyanins      |
| pmp000004 | 2.83E+06 | 1.28E+06 | 1.14                         | Jaceosidin                        | Anthocyanins      |
| pmb2947   | 8.18E+05 | 5.89E+05 | 0.47                         | Catechin-catechin-catechin        | Proanthocyanidins |
| pmb0837   | 8.67E+04 | 6.67E+04 | 0.38                         | Procyanidin A3                    | Proanthocyanidins |
| mws0836   | 7.51E+05 | 7.34E+05 | 0.03                         | Procyanidin B1                    | Proanthocyanidins |
| pmp000280 | 1.20E+06 | 1.18E+06 | 0.02                         | procyanidin C-2                   | Proanthocyanidins |
| pmp000274 | 5.59E+06 | 5.69E+06 | -0.03                        | procyanidin B-3                   | Proanthocyanidins |
| pmn001646 | 1.83E+05 | 2.35E+05 | -0.36                        | procyanidin C1                    | Proanthocyanidins |
| pme0436   | 1.71E+07 | 2.46E+07 | -0.52                        | Procyanidin B3                    | Proanthocyanidins |
| pmn001647 | 4.07E+05 | 7.24E+05 | -0.83                        | procyanidin C2                    | Proanthocyanidins |

|           |          |          |       |                       |                   |
|-----------|----------|----------|-------|-----------------------|-------------------|
| pmp000275 | 3.14E+04 | 7.52E+04 | -1.26 | gambiriin A-1         | Proanthocyanidins |
| pmp000273 | 2.57E+04 | 6.85E+04 | -1.41 | gambiriin B-3         | Proanthocyanidins |
| mws0169   | 3.18E+06 | 9.00E+06 | -1.50 | Cyanidin 3-rutinoside | Anthocyanins      |
| mws0171   | 8.18E+06 | 2.41E+07 | -1.56 | Cyanin chloride       | Anthocyanins      |

---

Key metabolites are enclosed in red boxes.

**Supplementary Table S4.** Base information statistics.

| Sample     | Raw Data (bp) | Clean Data (bp) | AF_Q20 (%) | AF_Q30 (%) | AF_GC (%) |
|------------|---------------|-----------------|------------|------------|-----------|
| 15 d ZK-1  | 7760782200    | 7728994925      | 98.05      | 94.30      | 47.53     |
| 15 d ZK-2  | 8149985700    | 8113066866      | 96.19      | 90.25      | 47.17     |
| 15 d ZK-3  | 7440591000    | 7408970072      | 98.03      | 94.29      | 47.34     |
| 45 d ZK-1  | 8391961800    | 8366095572      | 98.09      | 94.36      | 47.70     |
| 45 d ZK-2  | 7894026900    | 7867425490      | 98.03      | 94.20      | 47.62     |
| 45 d ZK-3  | 9351836400    | 9322501197      | 97.83      | 93.75      | 47.36     |
| 15 d N61-1 | 9682011900    | 9642763026      | 97.79      | 93.68      | 46.98     |
| 15 d N61-2 | 9845860500    | 9805718151      | 98.08      | 94.36      | 47.95     |
| 15 d N61-3 | 10474228800   | 10438291339     | 97.95      | 94.09      | 46.68     |
| 45 d N61-1 | 10721295300   | 10692850135     | 98.03      | 94.24      | 48.07     |
| 45 d N61-2 | 9989629800    | 9960436284      | 98.05      | 94.33      | 48.00     |
| 45 d N61-3 | 10472289300   | 10443240899     | 97.78      | 93.70      | 48.01     |

**Supplementary Table S5.** Pearson correlation coefficient between positively correlated metabolites and genes.

| Gene Name         | Gene ID     | mws0997 |                 | mws1048 |                 | pmb0550 |                 | Annotation                                                                                            |
|-------------------|-------------|---------|-----------------|---------|-----------------|---------|-----------------|-------------------------------------------------------------------------------------------------------|
|                   |             | PPC     | <i>P</i> -value | PPC     | <i>P</i> -value | PPC     | <i>P</i> -value |                                                                                                       |
| <i>CsLIMYBLX4</i> | MSTRG.47184 | 0.90    | 5.20E-05        | 0.99    | 8.35E-10        | 0.98    | 6.21E-08        | PREDICTED: L10-interacting MYB domain-containing protein-like isoform X4 [ <i>Oryza brachyantha</i> ] |
| <i>CsMYB90</i>    | MSTRG.14584 | 0.80    | 1.79E-03        | 0.96    | 8.93E-07        | 0.92    | 2.18E-05        | anthocyanin 1 [ <i>Camellia sinensis</i> ]                                                            |
| <i>CsLIMYBL1</i>  | MSTRG.15849 | 0.91    | 3.47E-05        | 0.91    | 3.23E-05        | 0.93    | 1.58E-05        | PREDICTED: L10-interacting MYB domain-containing protein-like [ <i>Nicotiana attenuata</i> ]          |
| <i>CsLIMYBL2</i>  | MSTRG.32788 | 0.85    | 4.29E-04        | 0.92    | 2.83E-05        | 0.91    | 5.03E-05        | PREDICTED: L10-interacting MYB domain-containing protein-like, partial [ <i>Setaria italica</i> ]     |
| <i>CsMYB4</i>     | TEA_029924  | 0.83    | 8.87E-04        | 0.93    | 1.27E-05        | 0.91    | 3.11E-05        | PREDICTED: myb-related protein Myb4 [ <i>Theobroma cacao</i> ]                                        |
| <i>CsBHLH018</i>  | MSTRG.29737 | 0.83    | 7.47E-04        | 0.96    | 9.91E-07        | 0.93    | 9.96E-06        | transcription factor BHLH018, partial [ <i>Vaccinium corymbosum</i> ]                                 |
| <i>CsBHLH51</i>   | TEA_000397  | 0.71    | 9.97E-03        | 0.87    | 1.95E-04        | 0.86    | 3.91E-04        | PREDICTED: transcription factor bHLH51 [ <i>Vitis vinifera</i> ]                                      |
| <i>CsBHLH49</i>   | MSTRG.19098 | 0.74    | 5.81E-03        | 0.82    | 1.21E-03        | 0.81    | 1.51E-03        | PREDICTED: transcription factor bHLH49 isoform X2 [ <i>Vitis vinifera</i> ]                           |
| <i>CsLIMYBLX2</i> | MSTRG.45518 | 0.79    | 2.23E-03        | 0.82    | 1.16E-03        | 0.81    | 1.50E-03        | PREDICTED: L10-interacting MYB domain-containing protein-like isoform X2 [ <i>Glycine max</i> ]       |
| <i>CsANS2</i>     | MSTRG.17031 | 0.67    | 1.82E-02        | 0.84    | 7.18E-04        | 0.79    | 2.46E-03        | anthocyanidin synthase [ <i>Camellia sinensis</i> ]                                                   |
| <i>CsANS3</i>     | TEA_014163  | 0.60    | 4.10E-02        | 0.78    | 2.98E-03        | 0.75    | 5.33E-03        | anthocyanidin synthase [ <i>Camellia sinensis</i> ]                                                   |
| <i>CsF3'H</i>     | TEA_014906  | 0.71    | 1.36E-02        | 0.83    | 7.86E-04        | 0.81    | 1.51E-03        | flavonoid 3'-hydroxylase 1 [ <i>Camellia sinensis</i> ]                                               |
| <i>CsF3'HI</i>    | TEA_009006  | 0.61    | 1.99E-01        | 0.81    | 5.01E-02        | 0.78    | 6.96E-02        | flavonoid 3'-hydroxylase 1 [ <i>Camellia sinensis</i> ]                                               |

PPC : Pearson correlation coefficient. mws0997, mws1048 and pmb0550 respectively represent the positively correlated metabolites petunidin 3-*O*-glucose, cyanidin 3-*O*-galactoside, and cyanidin 3-*O*-glucoside.

**Supplementary Table S6.** Pearson correlation coefficient between negatively correlated metabolites and genes.

| Gene Name        | Gene ID    | mws1293 |                 | mws1295 |                 | mws1296 |                 | Annotation                                                                              |
|------------------|------------|---------|-----------------|---------|-----------------|---------|-----------------|-----------------------------------------------------------------------------------------|
|                  |            | PPC     | <i>P</i> -value | PPC     | <i>P</i> -value | PPC     | <i>P</i> -value |                                                                                         |
| <i>CsLIMYBX3</i> | TEA_001647 | 0.93    | 1.53E-05        | 0.96    | 5.66E-07        | 0.94    | 4.37E-06        | L10-interacting MYB domain-containing protein-like isoform X3 [ <i>Ananas comosus</i> ] |
| <i>CsBHLH25</i>  | TEA_014434 | 0.92    | 1.97E-05        | 0.93    | 8.65E-06        | 0.88    | 1.44E-04        | PREDICTED: transcription factor bHLH18 [ <i>Theobroma cacao</i> ]                       |
| <i>CsPPO4</i>    | TEA_004892 | 0.90    | 6.36E-05        | 0.91    | 3.39E-05        | 0.85    | 4.24E-04        | polyphenoloxidase [ <i>Camellia nitidissima</i> ]                                       |
| <i>CsPPO5</i>    | TEA_024006 | 0.94    | 6.83E-06        | 0.94    | 7.80E-06        | 0.89    | 1.23E-04        | polyphenoloxidase [ <i>Camellia nitidissima</i> ]                                       |
| <i>CsPPO6</i>    | TEA_022444 | 0.95    | 1.69E-06        | 0.97    | 2.51E-07        | 0.94    | 6.20E-06        | polyphenoloxidase [ <i>Camellia nitidissima</i> ]                                       |

PPC : Pearson correlation coefficient. mws1293, mws1295, and mws1296 represent negatively correlated metabolites theaflavin, theaflavin-3'-gallate, and theaflavin-3, 3'-digallate, respectively.

**Supplementary Table S7.** Expression levels of genes with strong correlations with key metabolites in Zikui (ZK) and N61 tea plants at 15 d.

| Gene Name         | Gene ID     | 15 d N61<br>(mean-FPKM) | 15 d ZK<br>(mean-FPKM) | log <sub>2</sub> FC (15 d<br>ZK/15 d N61) | P-value  | Regulated | Annotation                                                                                            |
|-------------------|-------------|-------------------------|------------------------|-------------------------------------------|----------|-----------|-------------------------------------------------------------------------------------------------------|
| <i>CsLIMYBLX4</i> | MSTRG.47184 | 0.01                    | 16.81                  | 10.30                                     | 5.81E-34 | up        | PREDICTED: L10-interacting MYB domain-containing protein-like isoform X4 [ <i>Oryza brachyantha</i> ] |
| <i>CsMYB90</i>    | MSTRG.14584 | 1.97                    | 34.47                  | 4.13                                      | 3.2E-113 | up        | anthocyanin 1 [ <i>Camellia sinensis</i> ]                                                            |
| <i>CsLIMYBL1</i>  | MSTRG.15849 | 0.52                    | 6.14                   | 3.55                                      | 1.85E-32 | up        | PREDICTED: L10-interacting MYB domain-containing protein-like [ <i>Nicotiana attenuata</i> ]          |
| <i>CsLIMYBL2</i>  | MSTRG.32788 | 5.62                    | 17.52                  | 1.64                                      | 2.4E-35  | up        | PREDICTED: L10-interacting MYB domain-containing protein-like, partial [ <i>Setaria italica</i> ]     |
| <i>CsMYB4</i>     | TEA_029924  | 2.18                    | 6.35                   | 1.54                                      | 1.62E-12 | up        | PREDICTED: myb-related protein Myb4 [ <i>Theobroma cacao</i> ]                                        |
| <i>CsBHLH018</i>  | MSTRG.29737 | 0.00                    | 2.11                   | 11.05                                     | 3.04E-13 | up        | transcription factor BHLH018, partial [ <i>Vaccinium corymbosum</i> ]                                 |
| <i>CsBHLH51</i>   | TEA_000397  | 1.78                    | 5.89                   | 1.72                                      | 6.45E-09 | up        | PREDICTED: transcription factor bHLH51 [ <i>Vitis vinifera</i> ]                                      |
| <i>CsBHLH49</i>   | MSTRG.19098 | 1.57                    | 3.14                   | 1.00                                      | 9.39E-06 | up        | PREDICTED: transcription factor bHLH49 isoform X2 [ <i>Vitis vinifera</i> ]                           |
| <i>CsLIMYBLX2</i> | MSTRG.45518 | 0.59                    | 3.78                   | 2.68                                      | 8.47E-17 | up        | PREDICTED: L10-interacting MYB domain-containing protein-like isoform X2 [ <i>Glycine max</i> ]       |
| <i>CsANS2</i>     | MSTRG.17031 | 103.66                  | 238.45                 | 1.20                                      | 4.85E-22 | up        | anthocyanidin synthase [ <i>Camellia sinensis</i> ]                                                   |
| <i>CsANS3</i>     | TEA_014163  | 10.84                   | 18.50                  | 0.77                                      | 1.13E-14 | up        | anthocyanidin synthase [ <i>Camellia sinensis</i> ]                                                   |
| <i>CsF3'H</i>     | TEA_014906  | 0.51                    | 1.05                   | 1.04                                      | 0.00463  | up        | flavonoid 3'-hydroxylase 1 [ <i>Camellia sinensis</i> ]                                               |

|                  |             |       |        |       |          |      |                                                                                            |
|------------------|-------------|-------|--------|-------|----------|------|--------------------------------------------------------------------------------------------|
| <i>CsF3'H1</i>   | TEA_009006  | 74.11 | 116.83 | 0.66  | 1.34E-12 | up   | flavonoid 3'-hydroxylase 3 [ <i>Camellia sinensis</i> ]                                    |
| <i>CsLIMYBX3</i> | TEA_001647  | 13.13 | 0.03   | -8.77 | 2.88E-22 | down | L10-interacting MYB domain-containing protein-like isoform X3<br>[ <i>Ananas comosus</i> ] |
| <i>CsBHLH25</i>  | TEA_014434  | 8.14  | 2.49   | -1.71 | 7.58E-15 | down | PREDICTED: transcription factor bHLH18 [ <i>Theobroma cacao</i> ]                          |
| <i>CsPPO4</i>    | TEA_004892  | 42.29 | 5.01   | -3.08 | 6.84E-65 | down | polyphenoloxidase [ <i>Camellia nitidissima</i> ]                                          |
| <i>CsPPO5</i>    | TEA_024006  | 12.37 | 2.94   | -2.07 | 5.27E-15 | down | polyphenoloxidase [ <i>Camellia nitidissima</i> ]                                          |
| <i>CsPPO6</i>    | TEA_022444  | 14.79 | 1.64   | -3.17 | 7.99E-17 | down | polyphenoloxidase [ <i>Camellia nitidissima</i> ]                                          |
| -                | MSTRG.29079 | 0.03  | 3.57   | 6.74  | 6.13E-07 | up   | -                                                                                          |
| -                | MSTRG.17415 | 0.54  | 5.15   | 3.25  | 1.17E-05 | up   | -                                                                                          |
| -                | MSTRG.35246 | 3.03  | 8.56   | 1.50  | 5.02E-09 | up   | -                                                                                          |
| -                | TEA_003607  | 7.63  | 32.39  | 2.09  | 4.91E-14 | up   | -                                                                                          |
| -                | MSTRG.27856 | 0.24  | 5.65   | 4.56  | 1.09E-16 | up   | -                                                                                          |
| -                | MSTRG.6132  | 0.06  | 4.20   | 6.21  | 1.19E-26 | up   | -                                                                                          |
| -                | MSTRG.30086 | 0.08  | 1.28   | 4.06  | 0.007107 | up   | -                                                                                          |
| -                | MSTRG.31110 | 0.00  | 5.55   | 12.44 | 2.33E-17 | up   | -                                                                                          |
| -                | MSTRG.2094  | 0.36  | 3.00   | 3.05  | 2.28E-07 | up   | -                                                                                          |
| -                | MSTRG.12458 | 0.08  | 1.30   | 3.97  | 6.1E-05  | up   | -                                                                                          |
| -                | MSTRG.33921 | 2.26  | 0.78   | -1.54 | 2.55E-04 | down | -                                                                                          |
| -                | MSTRG.29824 | 0.94  | 0.08   | -3.62 | 1.32E-02 | down | -                                                                                          |

|   |             |      |      |       |          |      |   |
|---|-------------|------|------|-------|----------|------|---|
| - | MSTRG.14480 | 1.79 | 0.60 | -1.57 | 1.34E-02 | down | - |
| - | MSTRG.1185  | 2.65 | 0.51 | -2.38 | 1.78E-03 | down | - |
| - | MSTRG.38417 | 2.40 | 1.18 | -1.03 | 2.50E-02 | down | - |
| - | MSTRG.4356  | 5.79 | 2.05 | -1.50 | 1.46E-07 | down | - |
| - | MSTRG.46725 | 7.71 | 0.82 | -3.24 | 9.07E-25 | down | - |
| - | MSTRG.45508 | 0.97 | 0.42 | -1.22 | 1.60E-01 | down | - |
| - | TEA_019718  | 0.39 | 0.06 | -2.63 | 5.69E-03 | down | - |

---

**Supplementary Table S8.** Expression levels of genes strongly related to key metabolites in Zikui (ZK) at 15 d and 45 d.

| Gene<br>Name      | Gene ID     | 15 d ZK<br>(mean-FPKM) | 45 d ZK<br>(mean-FPKM) | log <sub>2</sub> FC(15 d<br>ZK/45 d ZK) | P-value  | Regulated | Annotation                                                                                            |
|-------------------|-------------|------------------------|------------------------|-----------------------------------------|----------|-----------|-------------------------------------------------------------------------------------------------------|
| <i>CsLIMYBLX4</i> | MSTRG.47184 | 16.81                  | 3.10                   | 2.44                                    | 1.19E-15 | up        | PREDICTED: L10-interacting MYB domain-containing protein-like isoform X4 [ <i>Oryza brachyantha</i> ] |
| <i>CsMYB90</i>    | MSTRG.14584 | 34.47                  | 0.16                   | 7.75                                    | 2.81E-53 | up        | anthocyanin 1 [ <i>Camellia sinensis</i> ]                                                            |
| <i>CsLIMYBL1</i>  | MSTRG.15849 | 6.14                   | 3.32                   | 0.89                                    | 9.46E-03 | up        | PREDICTED: L10-interacting MYB domain-containing protein-like [ <i>Nicotiana attenuata</i> ]          |
| <i>CsLIMYBL2</i>  | MSTRG.32788 | 17.52                  | 10.46                  | 0.74                                    | 4.81E-03 | up        | PREDICTED: L10-interacting MYB domain-containing protein-like, partial [ <i>Setaria italica</i> ]     |
| <i>CsMYB4</i>     | TEA_029924  | 6.35                   | 0.69                   | 3.21                                    | 2.55E-22 | up        | PREDICTED: myb-related protein Myb4 [ <i>Theobroma cacao</i> ]                                        |
| <i>CsBHLH018</i>  | MSTRG.29737 | 2.11                   | 0.50                   | 2.08                                    | 4.42E-05 | up        | transcription factor BHLH018, partial [ <i>Vaccinium corymbosum</i> ]                                 |
| <i>CsBHLH51</i>   | TEA_000397  | 5.89                   | 0.52                   | 3.51                                    | 7.33E-10 | up        | PREDICTED: transcription factor bHLH51 [ <i>Vitis vinifera</i> ]                                      |
| <i>CsBHLH49</i>   | MSTRG.19098 | 3.14                   | 2.02                   | 0.64                                    | 1.52E-01 | up        | PREDICTED: transcription factor bHLH49 isoform X2 [ <i>Vitis vinifera</i> ]                           |
| <i>CsLIMYBLX2</i> | MSTRG.45518 | 3.78                   | 1.96                   | 0.95                                    | 4.51E-03 | up        | PREDICTED: L10-interacting MYB domain-containing protein-like isoform X2 [ <i>Glycine max</i> ]       |
| <i>CsANS2</i>     | MSTRG.17031 | 238.45                 | 97.25                  | 1.29                                    | 1.83E-03 | up        | anthocyanidin synthase [ <i>Camellia sinensis</i> ]                                                   |
| <i>CsANS3</i>     | TEA_014163  | 18.50                  | 0.95                   | 4.28                                    | 6.07E-62 | up        | anthocyanidin synthase [ <i>Camellia sinensis</i> ]                                                   |
| <i>CsF3'H</i>     | TEA_014906  | 1.05                   | 0.64                   | 0.71                                    | 2.51E-01 | up        | flavonoid 3'-hydroxylase 1 [ <i>Camellia sinensis</i> ]                                               |
| <i>CsF3'H1</i>    | TEA_009006  | 116.83                 | 28.42                  | 2.04                                    | 3.76E-18 | up        | flavonoid 3'-hydroxylase 3 [ <i>Camellia sinensis</i> ]                                               |

|                  |             |       |      |       |          |    |                                                                                            |
|------------------|-------------|-------|------|-------|----------|----|--------------------------------------------------------------------------------------------|
| <i>CsLIMYBX3</i> | TEA_001647  | 0.03  | 0.01 | 1.58  | 7.61E-01 | up | L10-interacting MYB domain-containing protein-like isoform X3<br>[ <i>Ananas comosus</i> ] |
| <i>CsBHLH25</i>  | TEA_014434  | 2.49  | 1.96 | 0.34  | 7.68E-01 | up | PREDICTED: transcription factor bHLH18 [ <i>Theobroma cacao</i> ]                          |
| <i>CsPPO4</i>    | TEA_004892  | 5.01  | 2.64 | 0.92  | 5.91E-03 | up | polyphenoloxidase [ <i>Camellia nitidissima</i> ]                                          |
| <i>CsPPO5</i>    | TEA_024006  | 2.94  | 0.09 | 4.98  | 5.43E-19 | up | polyphenoloxidase [ <i>Camellia nitidissima</i> ]                                          |
| <i>CsPPO6</i>    | TEA_022444  | 1.64  | 0.00 | 10.68 | 7.84E-06 | up | polyphenoloxidase [ <i>Camellia nitidissima</i> ]                                          |
| -                | MSTRG.29079 | 3.57  | 0.32 | 3.50  | 2.34E03  | up | -                                                                                          |
| -                | MSTRG.17415 | 5.15  | 2.59 | 0.99  | 1.44E01  | up | -                                                                                          |
| -                | MSTRG.35246 | 8.56  | 3.70 | 1.21  | 9.01E03  | up | -                                                                                          |
| -                | TEA_003607  | 32.39 | 0.21 | 7.25  | 2.20E09  | up | -                                                                                          |
| -                | MSTRG.27856 | 5.65  | 2.30 | 1.30  | 2.79E02  | up | -                                                                                          |
| -                | MSTRG.6132  | 4.20  | 0.12 | 5.09  | 5.49E11  | up | -                                                                                          |
| -                | MSTRG.30086 | 1.28  | 0.09 | 3.83  | 3.50E02  | up | -                                                                                          |
|                  | MSTRG.31110 | 5.55  | 3.03 | 0.87  | 2.46E02  | up | -                                                                                          |
| -                | MSTRG.2094  | 3.00  | 0.91 | 1.72  | 1.53E02  | up | -                                                                                          |
| -                | MSTRG.12458 | 1.30  | 0.00 | 10.35 | 3.06E05  | up | -                                                                                          |
| -                | MSTRG.33921 | 0.78  | 0.26 | 1.56  | 5.44E02  | up | -                                                                                          |
| -                | MSTRG.29824 | 0.08  | 0.00 | 6.26  | 5.64E01  | up | -                                                                                          |
| -                | MSTRG.14480 | 0.60  | 0.23 | 1.39  | 2.72E01  | up | -                                                                                          |
| -                | MSTRG.1185  | 0.51  | 0.00 | 8.99  | 1.47E02  | up | -                                                                                          |

|   |             |      |      |      |         |    |   |
|---|-------------|------|------|------|---------|----|---|
| - | MSTRG.38417 | 1.18 | 0.17 | 2.76 | 2.89E03 | up | - |
| - | MSTRG.4356  | 2.05 | 0.57 | 1.85 | 1.78E02 | up | - |
| - | MSTRG.46725 | 0.82 | 0.06 | 3.69 | 3.84E04 | up | - |
| - | MSTRG.45508 | 0.42 | 0.00 | 8.70 | 3.74E03 | up | - |
| - | TEA_019718  | 0.06 | 0.00 | 5.98 | 1.50E01 | up | - |

---

**Supplementary Table S9.** Pearson correlation coefficient between positively correlated metabolites and unannotated genes.

| Gene Name | Gene ID     | mws0997 |          | mws1048 |          | pmb0550 |          | Annotation |
|-----------|-------------|---------|----------|---------|----------|---------|----------|------------|
|           |             | PPC     | P-value  | PPC     | P-value  | PPC     | P-value  |            |
| -         | MSTRG.29079 | 0.90    | 8.29E-05 | 0.91    | 4.01E-05 | 0.91    | 4.05E-05 | -          |
| -         | MSTRG.17415 | 0.90    | 8.39E-05 | 0.87    | 2.60E-04 | 0.88    | 1.50E-04 | -          |
| -         | MSTRG.35246 | 0.89    | 9.13E-05 | 0.88    | 1.39E-04 | 0.90    | 6.75E-05 | -          |
| -         | TEA_003607  | 0.89    | 1.19E-04 | 0.90    | 5.51E-05 | 0.91    | 3.11E-05 | -          |
| -         | MSTRG.27856 | 0.89    | 1.26E-04 | 0.86    | 3.65E-04 | 0.89    | 1.16E-04 | -          |
| -         | MSTRG.6132  | 0.87    | 2.07E-04 | 0.87    | 2.40E-04 | 0.87    | 2.33E-04 | -          |
| -         | MSTRG.30086 | 0.90    | 7.02E-05 | 0.92    | 2.08E-05 | 0.95    | 3.11E-06 | -          |
| -         | MSTRG.31110 | 0.86    | 3.19E-04 | 0.91    | 4.05E-05 | 0.89    | 8.62E-05 | -          |
| -         | MSTRG.2094  | 0.86    | 3.73E-04 | 0.84    | 5.65E-04 | 0.84    | 5.76E-04 | -          |
| -         | MSTRG.12458 | 0.84    | 5.97E-04 | 0.89    | 1.28E-04 | 0.87    | 2.44E-04 | -          |

PPC : Pearson correlation coefficient. mws0997, mws1048 and pmb0550 respectively represent the positively correlated metabolites petunidin 3-*O*-glucose, cyanidin 3-*O*-galactoside, and cyanidin 3-*O*-glucoside.

**Supplementary Table S10.** Pearson correlation coefficient between negatively correlated metabolites and unannotated genes.

| Gene Name | Gene ID     | mws1293 |                 | mws1295 |                 | mws1296 |                 | Annotation |
|-----------|-------------|---------|-----------------|---------|-----------------|---------|-----------------|------------|
|           |             | PPC     | <i>P</i> -value | PPC     | <i>P</i> -value | PPC     | <i>P</i> -value |            |
| -         | MSTRG.33921 | 0.98    | 1.09E-08        | 0.97    | 7.80E-08        | 0.94    | 4.71E-06        | -          |
| -         | MSTRG.29824 | 0.98    | 3.55E-08        | 0.99    | 2.21E-09        | 0.97    | 2.02E-07        | -          |
| -         | MSTRG.14480 | 0.97    | 9.61E-08        | 0.97    | 3.40E-07        | 0.94    | 4.80E-06        | -          |
| -         | MSTRG.1185  | 0.97    | 2.22E-07        | 0.97    | 7.66E-08        | 0.97    | 3.22E-07        | -          |
| -         | MSTRG.38417 | 0.97    | 3.30E-07        | 0.93    | 1.03E-05        | 0.87    | 2.23E-04        | -          |
| -         | MSTRG.4356  | 0.96    | 4.27E-07        | 0.96    | 5.04E-07        | 0.91    | 3.34E-05        | -          |
| -         | MSTRG.46725 | 0.96    | 5.40E-07        | 0.98    | 4.68E-08        | 0.93    | 1.23E-05        | -          |
| -         | MSTRG.45508 | 0.96    | 6.00E-07        | 0.92    | 1.74E-05        | 0.86    | 3.60E-04        | -          |
| -         | TEA_019718  | 0.96    | 7.84E-07        | 0.98    | 2.00E-08        | 0.96    | 7.45E-07        | -          |

PPC : Pearson correlation coefficient. mws1293, mws1295, and mws1296 represent negatively correlated metabolites theaflavin, theaflavin-3'-gallate, and theaflavin-3, 3'-digallate, respectively.

**Supplementary Table S11.** Expression levels of structural genes involved in anthocyanin biosynthesis in Zikui (ZK) at 15 d and 45 d.

| Gene Name       | Gene ID     | 15 d ZK<br>(mean-FPKM) | 45 d ZK<br>(mean-FPKM) | log <sub>2</sub> FC (15 d<br>ZK /45 d ZK) | P-value  | Regulated | Annotation                                                                    |
|-----------------|-------------|------------------------|------------------------|-------------------------------------------|----------|-----------|-------------------------------------------------------------------------------|
| <i>CsPAL1</i>   | TEA_003071  | 35.12                  | 15.47                  | 1.18                                      | 3.70E-04 | up        | phenylalanine ammonia-lyase [ <i>Populus szechuanica</i> ]                    |
| <i>CsPAL2</i>   | TEA_020823  | 348.34                 | 73.18                  | 2.25                                      | 4.22E-07 | up        | phenylalanine ammonia-lyase [ <i>Camellia japonica</i> ]                      |
| <i>CsPAL3</i>   | TEA_022055  | 101.93                 | 18.54                  | 2.46                                      | 3.69E-12 | up        | phenylalanine ammonia-lyase [ <i>Camellia sinensis</i> ]                      |
| <i>CsPAL4</i>   | MSTRG.12851 | 66.50                  | 17.34                  | 1.94                                      | 5.20E-06 | up        | phenylalanine ammonia-lyase [ <i>Camellia sinensis</i> ]                      |
| <i>CsC4H1</i>   | TEA_013313  | 551.85                 | 191.38                 | 1.53                                      | 2.60E-08 | up        | cinnamate 4-hydroxylase [ <i>Osmanthus fragrans</i> ]                         |
| <i>CsC4H2</i>   | MSTRG.6357  | 351.34                 | 67.81                  | 2.37                                      | 1.00E-11 | up        | cinnamic acid 4-hydroxylase [ <i>Camellia chekiangoleosa</i> ]                |
| <i>CsC4H3</i>   | MSTRG.6358  | 5.34                   | 1.52                   | 1.82                                      | 1.41E-04 | up        | cinnamic acid 4-hydroxylase [ <i>Camellia chekiangoleosa</i> ]                |
| <i>Cs4CL1</i>   | TEA_023253  | 62.54                  | 8.77                   | 2.83                                      | 2.42E-32 | up        | PREDICTED: 4-coumarate--CoA ligase 2-like [ <i>Jatropha curcas</i> ]          |
| <i>Cs4CL2</i>   | MSTRG.2903  | 247.05                 | 41.56                  | 2.57                                      | 1.74E-16 | up        | 4-coumaroyl CoA ligase [ <i>Camellia sinensis</i> ]                           |
| <i>Cs4CL3</i>   | MSTRG.33696 | 2.11                   | 0.00                   | 11.05                                     | 7.37E-03 | up        | 4-coumarate--CoA ligase 2 [ <i>Glycine soja</i> ]                             |
| <i>CsF3'H2</i>  | TEA_006169  | 379.61                 | 151.49                 | 1.33                                      | 2.42E-03 | up        | flavonoid 3'-hydroxylase 2 [ <i>Camellia sinensis</i> ]                       |
| <i>CsF3'H3</i>  | MSTRG.6382  | 21.65                  | 0.69                   | 4.98                                      | 2.01E-24 | up        | flavanone 3-hydroxylase, partial [ <i>Camellia japonica</i> ]                 |
| <i>CsF3'5'H</i> | TEA_011933  | 1239.64                | 428.30                 | 1.53                                      | 1.21E-11 | up        | flavonoid 3',5'-hydroxylase [ <i>Camellia sinensis</i> var. <i>sinensis</i> ] |
| <i>CsANS1</i>   | TEA_014156  | 1.15                   | 0.05                   | 4.43                                      | 1.05E-04 | up        | anthocyanidin synthase [ <i>Camellia sinensis</i> ]                           |
| <i>CsANS2</i>   | MSTRG.17031 | 238.45                 | 97.25                  | 1.29                                      | 1.83E-03 | up        | anthocyanidin synthase [ <i>Camellia sinensis</i> ]                           |
| <i>CsANS3</i>   | TEA_014163  | 18.50                  | 0.95                   | 4.28                                      | 6.07E-62 | up        | anthocyanidin synthase [ <i>Camellia sinensis</i> ]                           |

|              |            |       |      |      |          |    |                                                            |
|--------------|------------|-------|------|------|----------|----|------------------------------------------------------------|
| <i>CsUGT</i> | TEA_001487 | 70.11 | 1.94 | 5.17 | 3.22E-41 | up | UDP-glycosyltransferase 78A15 [ <i>Camellia sinensis</i> ] |
|--------------|------------|-------|------|------|----------|----|------------------------------------------------------------|

---

**Supplementary Table S12.** Primer sequences used in the study.

| Gene Name         | Gene ID     | Forward Primer (5'→3') | Reverse Primer (5'→3') | Purpose      |
|-------------------|-------------|------------------------|------------------------|--------------|
| <i>TUBA3</i>      | TEA_013193  | TTAGGACAGGGACTTACCGC   | TCCAAAAGCACAGCCACATC   | qRT-PCR      |
| <i>CsLIMYBLX4</i> | MSTRG.47184 | ACCCGCAAGACCCACTAATC   | GCCGTCAGAACCACCCAG     | qRT-PCR      |
| <i>CsMYB90</i>    | MSTRG.14584 | GGTCGTTGATTGCGGGTAGA   | GGTAGTGGAAATGGCTCGCT   | qRT-PCR      |
| <i>CsBHLH51</i>   | TEA_000397  | TCGCATAAAAAGCAAGAGGCA  | ACTGAGAACTAATCGCTGGAGG | qRT-PCR      |
| <i>CsANS2</i>     | MSTRG.17031 | CTGCCCTCACCTTCATCCTC   | CGCCACGAAATCCTCACTT    | qRT-PCR      |
| <i>CSF3'H1</i>    | TEA_009006  | GGTTAGCAACAGCAGCCATC   | TGGGGGAGAGAGCCGATTAG   | qRT-PCR      |
| <i>CsLIMYBX3</i>  | TEA_001647  | ATTTGGTGGTGGTTCGTCCT   | TGAGGTTTGTGTTGAAGTTGCT | qRT-PCR      |
| <i>CsBHLH25</i>   | TEA_014434  | CACTGTCGTTGCTCAGATGG   | CACACTTCCTCCGCTCCTG    | qRT-PCR      |
| <i>CsPPO4</i>     | TEA_004892  | ACCACCATTCCCACCCATTC   | AGCCTCCTAAGCCAATAAGCA  | qRT-PCR      |
| <i>CsMYB90</i>    | MSTRG.14584 | ATGGACAGTGTTTGCTGTG    | TCATTCATCACCTAACAG     | Gene cloning |

**Supplementary Figure legends:**

**Supplementary Figure S1:** Kyoto Encyclopedia of Genes and Genomes (KEGG) enrichment of differential metabolites in Zikui (ZK) and N61 tea plants at 15 d.

**Supplementary Figure S2:** Gene Ontology (GO) enrichment of differentially expressed genes of Zikui (ZK) and N61 tea plants at 15 d and 45 d. (A) GO enrichment of 15 d N61 vs. 15 d ZK; (B) GO enrichment of 15 d ZK vs. 45 d ZK.

**Supplementary Figure S3:** KEGG enrichment of differentially expressed genes of Zikui (ZK) and N61 tea plants at 15 d and 45 d. The y-coordinate represents the pathway item, and the y-coordinate represents the rich factor. Dots represent the number of genes with significant differential expression, the size of the dot represents the number of genes with significant differential expression, where larger dots indicate more genes with significantly different expression. Dots in different colors represent different q-values.

**Supplementary Figure S4:** Expression level of *CsMYB90* in wild-type (WT) and transgenic *Nicotiana tabacum* 'K326' (n = 3 independent biological samples).

**Supplementary Figure S5:** Metabolomic data of Zikui (ZK) and N61 leaves. (A) PCA (Principal component analysis) clustering based on Zikui (ZK) and N61 metabolomic data; (B) HCA (hierarchical cluster analysis) clustering based on Zikui (ZK) and N61 metabolomic data.

Supplementary Figure S1

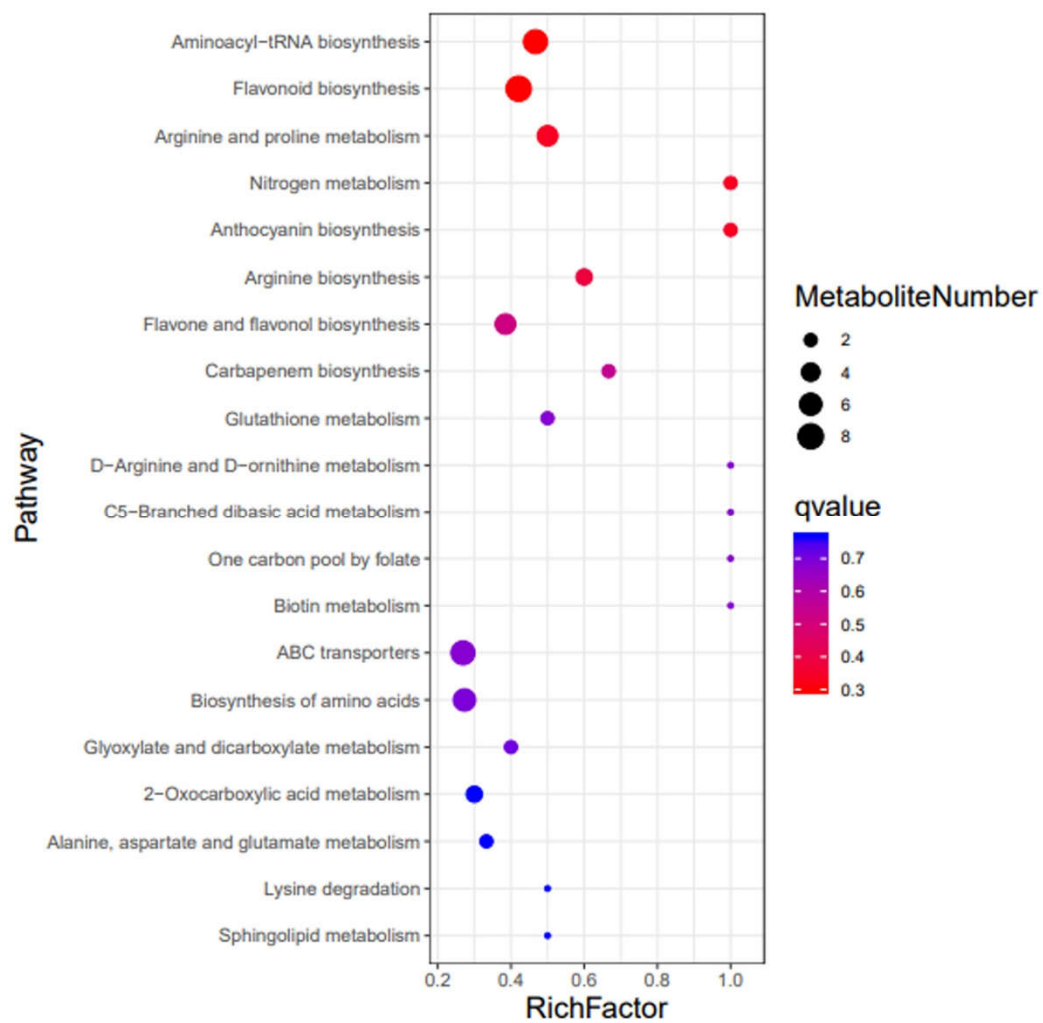

### Supplementary Figure S2

A

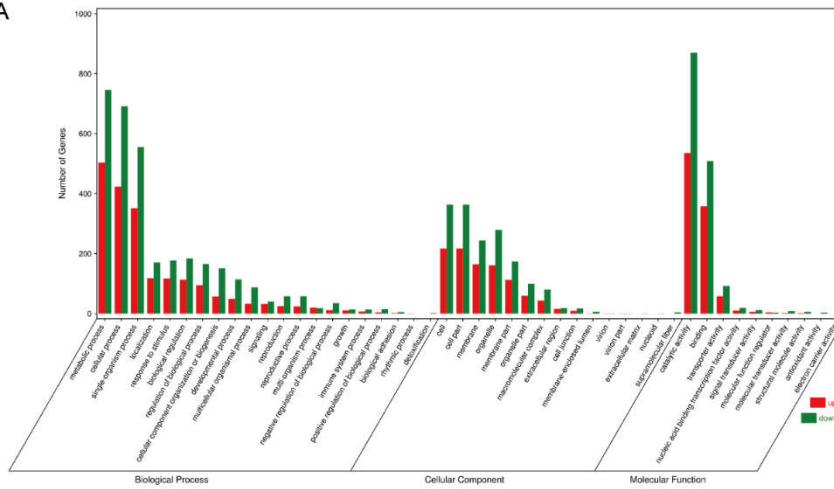

B

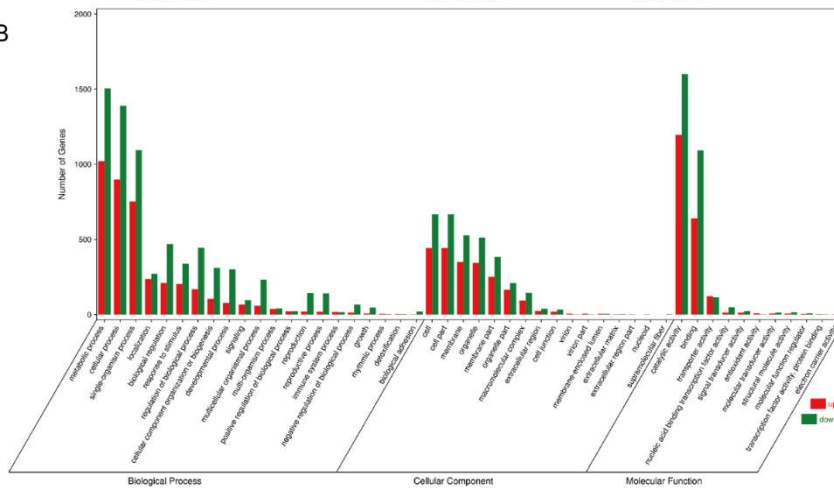

Supplementary Figure S3

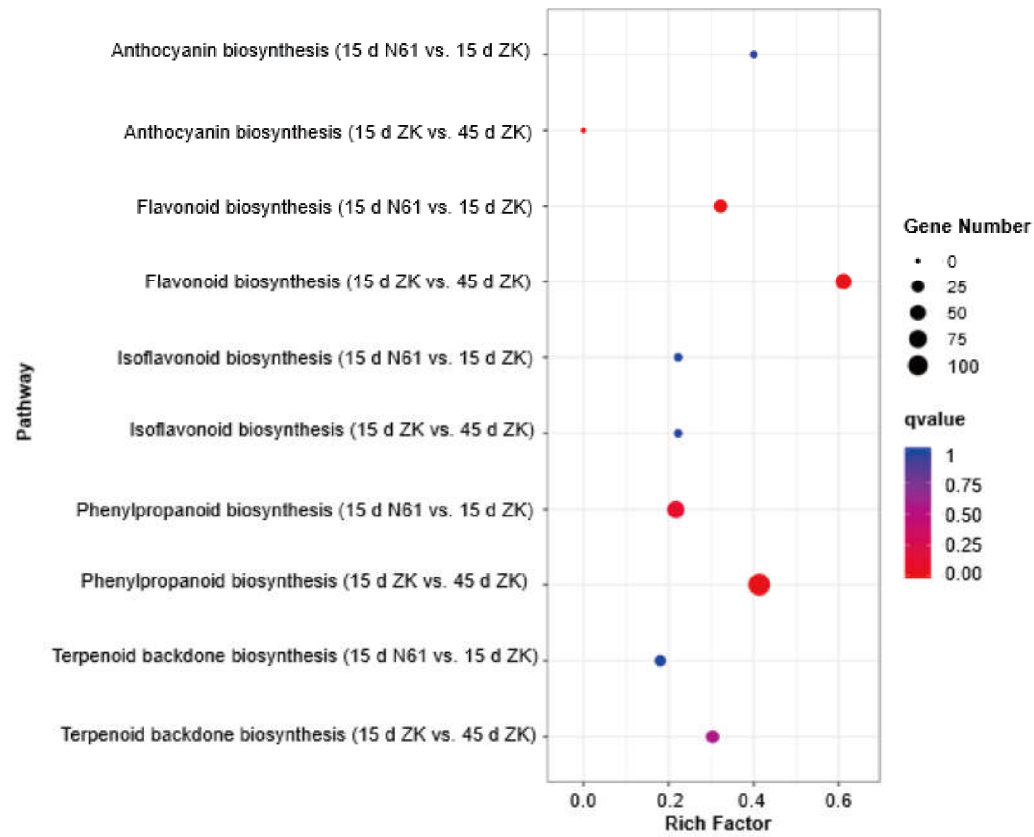

**Supplementary Figure S4**

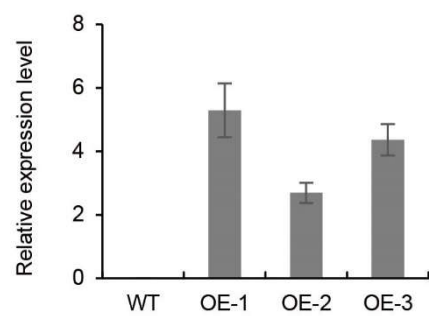

Supplementary Figure S5:

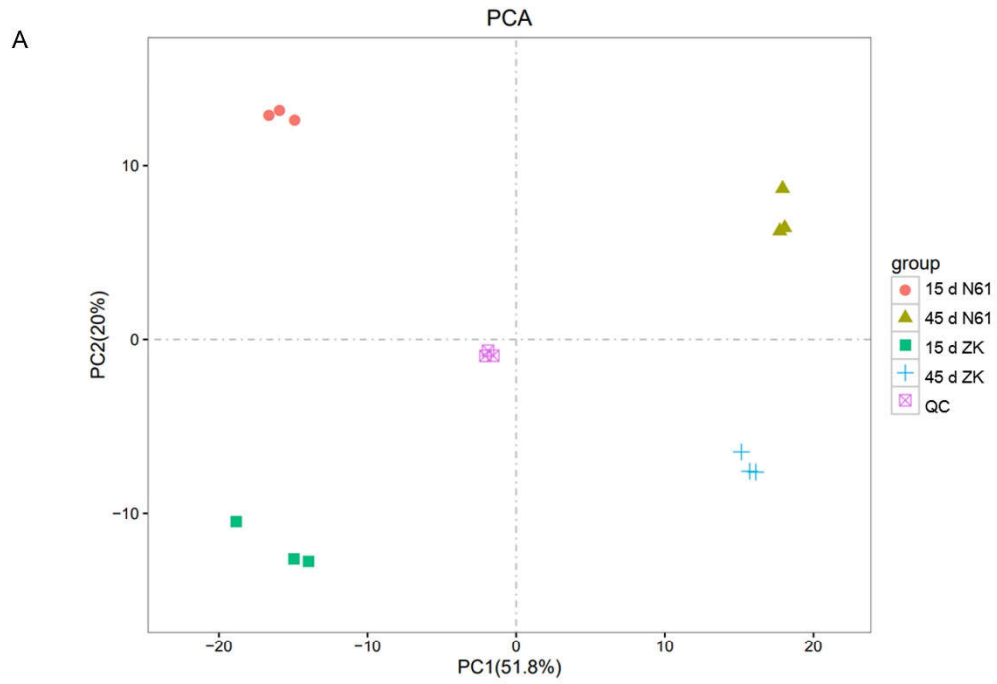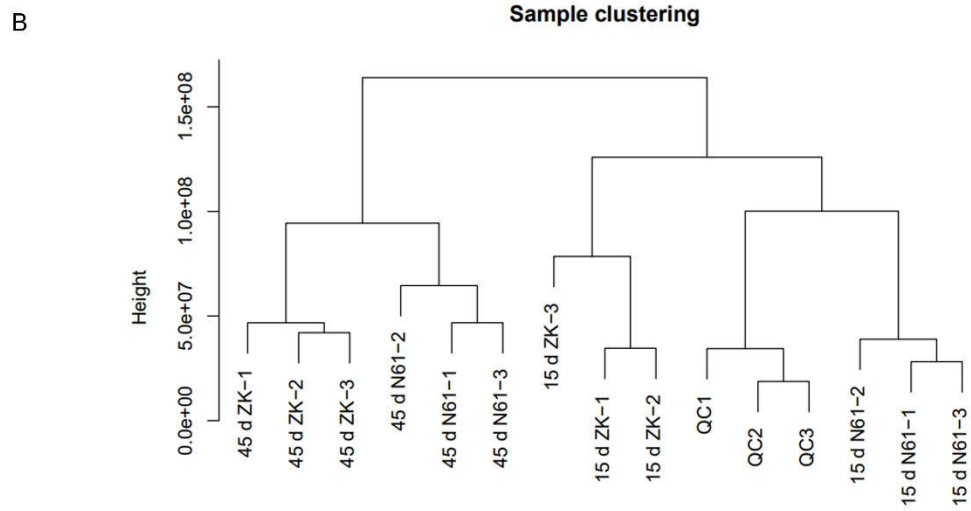

Supplement: s1 [file s1]
